# Supplementary material for: Effects of Air Pollution and the Introduction of the London Low Emission Zone on the Prevalence of Respiratory and Allergic Symptoms in Schoolchildren in East London: A Sequential Cross-Sectional Study
Source: PLOS journal article supplement (doi:10.1371/journal.pone.0109121), 2015-08-21
Supplement: S3 (10.1371/journal.pone.0109121.s003) [file journal.pone.0109121.s003]

**S2 Table: Definitions of current and lifetime respiratory/allergic symptoms**

| <b>Symptom</b> | <b>Definition</b>                                                                                                                                                                                                                                                                                                                                                    |
|----------------|----------------------------------------------------------------------------------------------------------------------------------------------------------------------------------------------------------------------------------------------------------------------------------------------------------------------------------------------------------------------|
| Current        |                                                                                                                                                                                                                                                                                                                                                                      |
| Wheeze         | Has your child had wheezing or whistling in the chest in the past 12 months?                                                                                                                                                                                                                                                                                         |
| Severe wheeze  | Has your child had wheezing or whistling in the chest in the last 12 months? AND AT LEAST ONE OF: $\geq 4$ attacks of wheezing in the past 12 months; $\geq 1$ night/week of sleep disturbed by wheezing in the past 12 months; wheezing severe enough to limit speech to only one or two words at a time between breaths in the past 12 months.                     |
| Rhinitis       | In the past 12 months, has your child had a problem with sneezing, or a runny, or a blocked nose when he/she DID NOT have a cold or the flu?                                                                                                                                                                                                                         |
| Eczema         | Has your child ever had an itchy rash which was coming and going for at least 6 months? AND Has your child had this itchy rash at any time in the last 12 months? AND Has this itchy rash at any time affected any of the following places: the folds of the elbows, behind the knees, in front of the ankles, under the buttocks, or around the neck, ears or eyes? |
| Lifetime       |                                                                                                                                                                                                                                                                                                                                                                      |
| Asthma         | Has your child ever had asthma?                                                                                                                                                                                                                                                                                                                                      |
| Hayfever       | Has your child ever had hay fever?                                                                                                                                                                                                                                                                                                                                   |
| Eczema         | Has your child ever had eczema?                                                                                                                                                                                                                                                                                                                                      |
